# Supplementary material for: Similar active genes cluster in specialized transcription factories
Source: PubMed Central journal article supplement — J Cell Biol. 2008 May 19;181(4):615–23. doi: 10.1083/jcb.200710053 (PMC2386102; doi:10.1083/jcb.200710053), 2008-05-19
Supplement: jcb.200710053_4.pdf [file jcb.200710053_4.pdf]

Table S1. **Oligonucleotide sequences of primers, linkers, and probes**

| <b>Oligonucleotide number</b> | <b>Element</b>                                                          | <b>Sequence</b>                                                                                                                                                     |
|-------------------------------|-------------------------------------------------------------------------|---------------------------------------------------------------------------------------------------------------------------------------------------------------------|
| Cloning                       |                                                                         |                                                                                                                                                                     |
| 1                             | Pol I (PCR primer pair)                                                 | GCGCGCATTAAATATTACGCCAAGCTTACGG<br>GCGCGCTAGCTTGTCTACTAATAACCCG                                                                                                     |
| 2                             | <i>HBB</i> intron 2 (PCR primer pair)                                   | GGGAAGCTTCTGAGAACTTCAGGGTGAGTC<br>GGGCTGCAGAAAGTGATGGGCCAGCACAC                                                                                                     |
| 3                             | 0 promoter (linker)                                                     | Sense [AC12]GGGGGGATTAATGGGGGGGCTAGCGGG, and<br>Anti-sense [AC12]CCCGCTAGCCCCCATTAATCCCCC,<br>where [AC12] is the 5' amino modifier C12                             |
| 4                             | <i>U2G</i> (PCR primer pair)                                            | GCGCAAGCTTTGTCTTTTCGCTGGCTCG<br>GGGCTGCAGCGCTCACAGGACTCGTG                                                                                                          |
| Probes                        |                                                                         |                                                                                                                                                                     |
| 5                             | <i>EGFP</i> (PCR primer pair used prior to nick translation)            | CGTAAACGGCCACAAGTTC<br>TCTCGTTGGGTCTTTGCTC                                                                                                                          |
| 6                             | <i>EGFP</i> (asymmetrical PCR primer pairs)                             | CGTAAACGGCCACAAGTTC<br>TTGAAGAAGTCGTGCTGC (pair 1)<br>GCACCATCTTCTCAAGGAC<br>CGGCCATGATATAGACGTTG (pair 2)<br>AGCAGAAGAACGGCATCAAG<br>TCTCGTTGGGTCTTTGCTC (pair 3)  |
| 7                             | <i>DsRed</i> (PCR primer pair used prior to nick translation)           | CGAGTTCATGCGCTCAAGG<br>TGCTCCACGATGGTGTAGTC                                                                                                                         |
| 8                             | <i>DsRed</i> (asymmetrical PCR primer pairs)                            | CGTCATCACCGAGTTCATGC<br>TTGGAGCCGACTGGAAGTGC (pair 1)<br>ACAAGAAGCTGCCTCCCCC<br>TGGTCTTCTTGCATCAG (pair 2)<br>ACAAGGCCCTGAAGCTGAAG<br>TGCTCCACGATGGTGTAGTC (pair 3) |
| 9                             | <i>Neo'</i> (PCR primer pair used prior to nick translation)            | GGATCGTTTCGCATGATT<br>GAGTCCCCTCAGAAGAA                                                                                                                             |
| 10                            | Pre- <i>U2</i> (single-stranded probe)                                  | [bio]CCGGAGGGGGTGCACCGTTCCT[bio],<br>where [bio] is biotin (5' or 3') tetra-ethyleneglycol                                                                          |
| 11                            | Real-time PCR<br><i>EGFP</i> (primer pair)                              | ACGTAACGGCCACAAGTTC<br>AAGTCGTGCTGCTTCATGTG                                                                                                                         |
| 12                            | <i>GAPDH</i> (primer pair)                                              | GAAGGTGAAGGTCGGAGTC<br>GAAGATGGTGATGGGATTC.                                                                                                                         |
| Sequencing                    |                                                                         |                                                                                                                                                                     |
| 13                            | pEGFP-C1                                                                | Fwd TAACCGTATTACCGCCATGC<br>Rev TCCGTATGTTGCATCACCTTC                                                                                                               |
| 3C                            |                                                                         |                                                                                                                                                                     |
| 14                            | <i>ALDOA-ALDOA</i> (primer pair used with <i>Bam</i> HI)                | AAATTCCTCTGAAGCACCG<br>TTAATGGGGCATCAAGCAC                                                                                                                          |
| 15                            | <i>ALDOA-ALDOA</i> (primer pair used with <i>Pst</i> I)                 | TTGCAAGTGAAGCCGAAATCG<br>AGGGTGTAGTCTCTGTGGG                                                                                                                        |
| 16                            | <i>EGFP-DsRed</i> (primer pair used with <i>Bam</i> HI)                 | TGAAGCGCATGAACTCGGTG<br>TGGTGCAGATGAACTCAGGG                                                                                                                        |
| 17                            | Plasmid backbone-host<br><i>U2</i> (primer pair used with <i>Pst</i> I) | CCTCTACAAATGTGGTATGGC<br>GGCAGTGGGAGCAAATTC                                                                                                                         |
| 18                            | <i>Neo'</i> (primer pair used for copy-number control)                  | ATTCGGCTATGACTGGGCAC<br>AGTGACAACGTCGAGCACAG                                                                                                                        |
